# Supplementary material
Source: PubMed Central journal article supplement (PMC6070426)
Supplement: NIHMS974250-supplement-1.pdf [file NIHMS974250-supplement-1.pdf]

**Table S1**

**Comparisons of brain region of interest (ROI) volumes between individuals with chronic kidney disease (CKD) and healthy controls without adjustment for other covariates.**

| Region of interest  | Normalized ROI volume, mm <sup>3</sup> * |        |                 |        | P           | Q <sup>#</sup> |
|---------------------|------------------------------------------|--------|-----------------|--------|-------------|----------------|
|                     | CKD<br>N=82                              |        | Control<br>N=63 |        |             |                |
|                     | Mean                                     | SD     | Mean            | SD     |             |                |
| Whole brain GM      | 818,409                                  | 49,719 | 832,509         | 33,615 | <b>0.04</b> | 0.2            |
| Whole brain WM      | 513,876                                  | 23,676 | 511,231         | 24,023 | 0.5         | 0.6            |
| Cortex GM           | 637,820                                  | 46,218 | 651,611         | 33,149 | <b>0.04</b> | 0.2            |
| Frontal GM, total   | 241,463                                  | 21,683 | 247,295         | 15,401 | 0.06        | 0.2            |
| Frontal GM, left    | 120,709                                  | 11,012 | 123,673         | 7,950  | 0.06        | 0.2            |
| Frontal GM, right   | 120,754                                  | 10,823 | 123,622         | 7,662  | 0.06        | 0.2            |
| Frontal WM          | 198,645                                  | 10,547 | 197,622         | 12,441 | 0.6         | 0.7            |
| Temporal GM, left   | 67,104                                   | 4,062  | 68,153          | 4,128  | 0.1         | 0.2            |
| Temporal GM, right  | 67,601                                   | 4,446  | 68,591          | 3,968  | 0.2         | 0.3            |
| Parietal GM, left   | 61,523                                   | 6,617  | 63,539          | 5,126  | <b>0.04</b> | 0.2            |
| Parietal GM, right  | 61,585                                   | 6,745  | 63,353          | 5,188  | 0.08        | 0.2            |
| Occipital GM, left  | 46,089                                   | 3,235  | 46,934          | 3,724  | 0.2         | 0.3            |
| Occipital GM, right | 46,193                                   | 3,433  | 47,231          | 3,548  | 0.1         | 0.2            |
| Limbic GM, left     | 23,476                                   | 1,991  | 23,610          | 1,722  | 0.7         | 0.7            |
| Limbic GM, right    | 22,785                                   | 1,801  | 22,904          | 1,695  | 0.7         | 0.7            |
| Amygdala            | 2,329                                    | 230    | 2,280           | 213    | 0.2         | 0.3            |
| Hippocampus         | 8,332                                    | 728    | 8,351           | 652    | 0.9         | 0.9            |
| Thalamus Proper     | 16,987                                   | 956    | 17,105          | 1,037  | 0.5         | 0.6            |
| Lateral Ventricles  | 11,676                                   | 5,506  | 10,230          | 4,259  | 0.08        | 0.2            |

\*ROI volumes calculated in cubic millimeters (mm<sup>3</sup>). Raw ROI volumes normalized for intracranial volume (ICV) by dividing ROI volume by ICV, then multiplying by a constant of 1,500,000 mm<sup>3</sup> (which represents the approximate average ICV) to scale to a larger value.

#False discovery rate-adjusted P values

GM: Gray matter; WM: White matter; SD: Standard deviation
