# Supplementary material
Source: PubMed Central journal article supplement (PMC6070426)
Supplement: NIHMS974250-supplement-2.pdf [file NIHMS974250-supplement-2.pdf]

**Table S2**

**Comparisons of brain region of interest (ROI) volumes between individuals with chronic kidney disease (CKD) (excluding kidney transplant recipients) and healthy controls, without adjustment for other covariates.**

| Region of interest  | Normalized ROI volume, mm <sup>3</sup> * [mean (SD)] |        |                 |        | P   |
|---------------------|------------------------------------------------------|--------|-----------------|--------|-----|
|                     | CKD (excluding transplant)<br>N=61                   |        | Control<br>N=63 |        |     |
|                     | Mean                                                 | SD     | Mean            | SD     |     |
| Whole brain GM      | 827,660                                              | 44,634 | 832,509         | 33,615 | 0.5 |
| Whole brain WM      | 510,012                                              | 44,634 | 511,231         | 24,023 | 0.8 |
| Cortex GM           | 644,638                                              | 43,290 | 651,611         | 33,149 | 0.3 |
| Frontal GM, total   | 245,283                                              | 20,495 | 247,295         | 15,401 | 0.5 |
| Frontal GM, left    | 122,603                                              | 10,355 | 123,673         | 7,950  | 0.5 |
| Frontal GM, right   | 122,680                                              | 10,313 | 123,622         | 7,662  | 0.6 |
| Frontal WM          | 197,170                                              | 9,832  | 197,622         | 12,441 | 0.8 |
| Temporal GM, left   | 67,033                                               | 3,797  | 68,153          | 4,129  | 0.1 |
| Temporal GM, right  | 67,560                                               | 4,248  | 68,592          | 3,968  | 0.2 |
| Parietal GM, left   | 62,742                                               | 6,159  | 63,539          | 5,126  | 0.4 |
| Parietal GM, right  | 62,727                                               | 6,088  | 63,353          | 5,188  | 0.5 |
| Occipital GM, left  | 46,357                                               | 3,152  | 46,934          | 3,724  | 0.4 |
| Occipital GM, right | 46,294                                               | 3,504  | 47,231          | 3,548  | 0.1 |
| Limbic GM, left     | 23,637                                               | 1,979  | 23,610          | 1,722  | 0.9 |
| Limbic GM, right    | 23,006                                               | 1,735  | 22,904          | 1,695  | 0.7 |
| Amygdala            | 2,319                                                | 239    | 2,280           | 213    | 0.3 |
| Hippocampus         | 8,279                                                | 804    | 8,351           | 652    | 0.6 |
| Thalamus Proper     | 16,998                                               | 952    | 17,106          | 1,037  | 0.5 |
| Lateral Ventricles  | 11,551                                               | 5,825  | 10,230          | 4,259  | 0.2 |

\*ROI volumes calculated in cubic millimeters (mm<sup>3</sup>). Raw ROI volumes normalized for intracranial volume (ICV) by dividing ROI volume by ICV, then multiplying by a constant of 1,500,000 mm<sup>3</sup> (which represents the approximate average ICV) to scale to a larger value.  
‡False discovery rate-adjusted P values  
GM: Gray matter; WM: White matter; SD: Standard deviation
