# Supplementary material
Source: PubMed Central journal article supplement (PMC6070426)
Supplement: NIHMS974250-supplement-3.pdf [file NIHMS974250-supplement-3.pdf]

**Table S3**

**Comparisons of brain region of interest (ROI) volumes between individuals with chronic kidney disease (CKD) and healthy controls, adjusted for age and sex.**

| Region of interest  | Normalized ROI volume, mm <sup>3</sup> * |                |                    |                | F value <sup>‡</sup> | P    |
|---------------------|------------------------------------------|----------------|--------------------|----------------|----------------------|------|
|                     | CKD<br>N=82                              |                | Control<br>N=63    |                |                      |      |
|                     | Least squares mean                       | Standard error | Least squares mean | Standard error |                      |      |
| Whole brain GM      | 820,443                                  | 3,536          | 829,862            | 4,040          | 3.05                 | 0.08 |
| Whole brain WM      | 512,691                                  | 1,789          | 512,774            | 2,044          | 0.00                 | 1.0  |
| Cortex GM           | 639,811                                  | 3,367          | 649,019            | 3,846          | 3.20                 | 0.08 |
| Frontal GM, total   | 242,495                                  | 1,639          | 245,953            | 1,872          | 1.91                 | 0.2  |
| Frontal GM, left    | 121,229                                  | 840            | 122,997            | 959            | 1.90                 | 0.2  |
| Frontal GM, right   | 121,266                                  | 824            | 122,956            | 941            | 1.81                 | 0.2  |
| Frontal WM          | 198,404                                  | 998            | 197,936            | 1,140          | 0.09                 | 0.8  |
| Temporal GM, left   | 67,186                                   | 413            | 68,045             | 472            | 1.85                 | 0.2  |
| Temporal GM, right  | 67,672                                   | 420            | 68,499             | 480            | 1.67                 | 0.2  |
| Parietal GM, left   | 61,805                                   | 500            | 63,172             | 572            | 3.20                 | 0.08 |
| Parietal GM, right  | 61,841                                   | 522            | 63,020             | 597            | 2.19                 | 0.1  |
| Occipital GM, left  | 46,165                                   | 355            | 46,835             | 406            | 1.52                 | 0.2  |
| Occipital GM, right | 46,285                                   | 360            | 47,111             | 411            | 2.26                 | 0.1  |
| Limbic GM, left     | 23,536                                   | 191            | 23,533             | 218            | 0.00                 | 1.0  |
| Limbic GM, right    | 22,826                                   | 185            | 22,852             | 211            | 0.01                 | 1.0  |
| Amygdala            | 2,326                                    | 25             | 2,284              | 28             | 1.27                 | 0.3  |
| Hippocampus         | 8,326                                    | 77             | 8,359              | 88             | 0.08                 | 0.8  |
| Thalamus Proper     | 16,991                                   | 111            | 17,101             | 126            | 0.43                 | 0.5  |
| Lateral Ventricles  | 11,542                                   | 539            | 10,404             | 615            | 1.92                 | 0.2  |

\*ROI volumes calculated in cubic millimeters (mm<sup>3</sup>). Raw ROI volumes normalized for intracranial volume (ICV) by dividing ROI volume by ICV, then multiplying by 1,500,000 mm<sup>3</sup> (a constant representing the approximate average ICV) to scale to a larger value.  
<sup>‡</sup>Degrees of freedom = 144  
 GM: Gray matter; WM: White matter; SE: standard error
