# Supplementary material
Source: PubMed Central journal article supplement (PMC6070426)
Supplement: NIHMS974250-supplement-4.pdf [file NIHMS974250-supplement-4.pdf]

**Table S4**

**Comparisons of brain region of interest (ROI) volumes between individuals with chronic kidney disease (CKD) (excluding kidney transplant recipients) and healthy controls, adjusted for age and sex.**

| Region of interest  | Normalized ROI volume, mm <sup>3*</sup> |                |                    |                | F value <sup>‡</sup> | P    |
|---------------------|-----------------------------------------|----------------|--------------------|----------------|----------------------|------|
|                     | CKD (excluding transplant)<br>N=61      |                | Control<br>N=63    |                |                      |      |
|                     | Least squares mean                      | Standard error | Least squares mean | Standard error |                      |      |
| Whole brain GM      | 828,487                                 | 3,676          | 831,708            | 3,616          | 0.39                 | 0.5  |
| Whole brain WM      | 509,514                                 | 2,077          | 511,714            | 2,044          | 0.56                 | 0.5  |
| Cortex GM           | 645,578                                 | 3,642          | 650,701            | 3,583          | 0.99                 | 0.3  |
| Frontal GM, total   | 245,950                                 | 1,784          | 246,649            | 1,755          | 0.08                 | 0.8  |
| Frontal GM, left    | 122,932                                 | 916            | 123,355            | 901            | 0.11                 | 0.7  |
| Frontal GM, right   | 123,018                                 | 900            | 123,294            | 885            | 0.05                 | 0.8  |
| Frontal WM          | 197,288                                 | 1,181          | 197,508            | 1,162          | 0.02                 | 0.9  |
| Temporal GM, left   | 67,035                                  | 463            | 68,151             | 455            | 2.92                 | 0.09 |
| Temporal GM, right  | 67,545                                  | 475            | 68,606             | 467            | 2.51                 | 0.1  |
| Parietal GM, left   | 62,860                                  | 544            | 63,425             | 535            | 0.54                 | 0.5  |
| Parietal GM, right  | 62,810                                  | 568            | 63,273             | 559            | 0.33                 | 0.6  |
| Occipital GM, left  | 46,371                                  | 421            | 46,920             | 414            | 0.85                 | 0.4  |
| Occipital GM, right | 46,320                                  | 427            | 47,205             | 420            | 2.16                 | 0.1  |
| Limbic GM, left     | 23,671                                  | 217            | 23,577             | 213            | 0.09                 | 0.8  |
| Limbic GM, right    | 23,016                                  | 210            | 22,895             | 206            | 0.17                 | 0.7  |
| Amygdala            | 2,317                                   | 29             | 2,282              | 28             | 0.72                 | 0.4  |
| Hippocampus         | 8,274                                   | 94             | 8,355              | 93             | 0.37                 | 0.5  |
| Thalamus Proper     | 17,000                                  | 129            | 17,103             | 127            | 0.31                 | 0.6  |
| Lateral Ventricles  | 11,444                                  | 629            | 10,333             | 619            | 1.57                 | 0.2  |

\*ROI volumes calculated in cubic millimeters (mm<sup>3</sup>). Raw ROI volumes normalized for intracranial volume (ICV) by dividing ROI volume by ICV, then multiplying by multiplying by 1,500,000 mm<sup>3</sup> (a constant representing the approximate average ICV) to scale to a larger value.  
<sup>‡</sup>Degrees of freedom = 123  
 GM: Gray matter; WM: White matter; SE: standard error
