# Supplementary material
Source: PubMed Central journal article supplement (PMC6070426)
Supplement: NIHMS974250-supplement-5.pdf [file NIHMS974250-supplement-5.pdf]

**Table S5**

**Comparisons of brain region of interest (ROI) volumes within the chronic kidney disease (CKD) group (excluding kidney transplant recipients), between individuals with eGFR <45 versus ≥45 mL/min/1.73m<sup>2</sup>, adjusted for age and sex.**

| Region of interest  | Normalized ROI volume, mm <sup>3</sup> *   |                |                                            |                | F value <sup>‡</sup> | P   |
|---------------------|--------------------------------------------|----------------|--------------------------------------------|----------------|----------------------|-----|
|                     | eGFR <45 mL/min/1.73m <sup>2</sup><br>N=31 |                | eGFR ≥45 mL/min/1.73m <sup>2</sup><br>N=30 |                |                      |     |
|                     | Least squares mean                         | Standard error | Least squares mean                         | Standard error |                      |     |
| Whole brain GM      | 821,892                                    | 5,780          | 833,620                                    | 5,876          | 2.01                 | 0.2 |
| Whole brain WM      | 513,466                                    | 2,937          | 506,443                                    | 2,986          | 2.79                 | 0.1 |
| Cortex GM           | 640,794                                    | 5,831          | 648,610                                    | 5,928          | 0.88                 | 0.4 |
| Frontal GM, total   | 243,390                                    | 2,706          | 247,239                                    | 2,751          | 0.99                 | 0.3 |
| Frontal GM, left    | 121,670                                    | 1,391          | 123,568                                    | 1,414          | 0.91                 | 0.3 |
| Frontal GM, right   | 121,720                                    | 1,359          | 123,671                                    | 1,382          | 1.01                 | 0.3 |
| Frontal WM          | 198,518                                    | 1,540          | 195,777                                    | 1,566          | 1.55                 | 0.2 |
| Temporal GM, left   | 67,037                                     | 580            | 67,029                                     | 589            | 0.00                 | 0.9 |
| Temporal GM, right  | 67,887                                     | 688            | 67,222                                     | 699            | 0.46                 | 0.5 |
| Parietal GM, left   | 62,067                                     | 856            | 63,439                                     | 870            | 1.26                 | 0.3 |
| Parietal GM, right  | 61,950                                     | 873            | 63,531                                     | 887            | 1.61                 | 0.2 |
| Occipital GM, left  | 46,011                                     | 562            | 46,714                                     | 571            | 0.76                 | 0.4 |
| Occipital GM, right | 46,259                                     | 585            | 46,329                                     | 595            | 0.01                 | 0.9 |
| Limbic GM, left     | 23,445                                     | 336            | 23,835                                     | 342            | 0.66                 | 0.4 |
| Limbic GM, right    | 22,749                                     | 297            | 23,272                                     | 302            | 1.52                 | 0.2 |
| Amygdala            | 2,336                                      | 44             | 2,301                                      | 44             | 0.32                 | 0.6 |
| Hippocampus         | 8,402                                      | 147            | 8,151                                      | 149            | 1.43                 | 0.2 |
| Thalamus Proper     | 16,904                                     | 174            | 17,094                                     | 177            | 0.59                 | 0.4 |
| Lateral Ventricles  | 12,523                                     | 970            | 10,545                                     | 986            | 2.03                 | 0.2 |

\*ROI volumes calculated in cubic millimeters (mm<sup>3</sup>). Raw ROI volumes normalized for intracranial volume (ICV) by dividing ROI volume by ICV, then multiplying by 1,500,000 mm<sup>3</sup> (a constant representing the approximate average ICV) to scale to a larger value.  
<sup>‡</sup>Degrees of freedom = 60  
 GM: Gray matter; WM: White matter; SE: standard error
