# Supplementary material
Source: PubMed Central journal article supplement (PMC6070426)
Supplement: NIHMS974250-supplement-6.pdf [file NIHMS974250-supplement-6.pdf]

**Table S6**

Multivariable linear regression analysis in chronic kidney disease (CKD) participants (N=82) to explore the relationship between estimated glomerular filtration rate (eGFR) and brain region of interest (ROI) volume, adjusted for age, sex, race, prematurity, hematocrit, and whether the participant started renal replacement therapy (RRT) at age  $\leq 5$  years.

| Region of interest  | Difference in normalized ROI volume (mm <sup>3*</sup> ) per 10 mL/min/1.73m <sup>2</sup> higher eGFR |                         | P           | Q <sup>#</sup> |
|---------------------|------------------------------------------------------------------------------------------------------|-------------------------|-------------|----------------|
|                     | Parameter estimate                                                                                   | 95% Confidence Interval |             |                |
| Whole brain GM      | 140.5                                                                                                | -22.5, 503.5            | 0.4         | 0.9            |
| Whole brain WM      | -162.6                                                                                               | -327.5, 2.2             | <b>0.05</b> | 0.5            |
| Cortex GM           | 95.7                                                                                                 | -254.0, 445.4           | 0.6         | 0.9            |
| Frontal GM, total   | -5.3                                                                                                 | -165.9, 155.3           | 0.9         | 0.9            |
| Frontal GM, left    | -7.6                                                                                                 | -90.7, 75.4             | 0.9         | 0.9            |
| Frontal GM, right   | 2.3                                                                                                  | -77.4, 82.1             | 0.9         | 0.9            |
| Frontal WM          | -90.9                                                                                                | -175.5, -6.3            | <b>0.04</b> | 0.5            |
| Temporal GM, left   | 18.7                                                                                                 | -18.8, 56.2             | 0.3         | 0.8            |
| Temporal GM, right  | 25.8                                                                                                 | -14.8, 66.5             | 0.2         | 0.8            |
| Parietal GM, left   | 9.8                                                                                                  | -43.0, 62.6             | 0.7         | 0.9            |
| Parietal GM, right  | 31.8                                                                                                 | -20.4, 84.0             | 0.2         | 0.8            |
| Occipital GM, left  | -0.2                                                                                                 | -31.8, 31.5             | 0.9         | 0.9            |
| Occipital GM, right | -6.7                                                                                                 | -39.7, 26.2             | 0.7         | 0.9            |
| Limbic GM, left     | 12.0                                                                                                 | -6.7, 30.9              | 0.2         | 0.8            |
| Limbic GM, right    | 9.7                                                                                                  | -7.9, 27.3              | 0.3         | 0.8            |
| Amygdala            | 0.06                                                                                                 | -2.3, 2.4               | 0.9         | 0.9            |
| Hippocampus         | -2.0                                                                                                 | -8.8, 4.7               | 0.6         | 0.9            |
| Thalamus Proper     | 0.1                                                                                                  | -9.9, 10.2              | 0.9         | 0.9            |
| Lateral Ventricles  | 5.3                                                                                                  | -50.2, 60.8             | 0.8         | 0.9            |

\*ROI volumes calculated in cubic millimeters (mm<sup>3</sup>). Raw ROI volumes normalized for intracranial volume (ICV) by dividing ROI volume by ICV, then multiplying by a constant of 1,500,000 mm<sup>3</sup> (which represents the approximate average ICV) to scale to a larger value.

<sup>#</sup>False discovery rate-adjusted P values

GM: Gray matter; WM: White matter
